# Supplementary material for: D–A–D 2H-benzo[d][1,2,3]triazole derivatives as p-type semiconductors in organic field-effect transistors
Source: Royal Society of Chemistry journal article supplement (doi:10.1039/c8ra03246g), 2018-01-01
Supplement: c8ra03246g1.pdf [file c8ra03246g1.pdf]

## Supporting Information

### **D-A-D 2*H*-benzo[*d*]1,2,3-triazole derivatives as p-type semiconductors in Organic Field-Effect Transistors (OFETs).**

Iván Torres-Moya[a]\*, Iratxe Arrechea-Marcos[b], Carlos Tardío[a], José R. Carrillo[a], Ángel Díaz-Ortiz[a], J. Teodomiro López Navarrete [b], M. Carmen Ruiz Delgado[b], Pilar Prieto [a]\*, Rocío Ponce Ortiz[b]\*.

[a] Department of Organic Chemistry, Faculty of Chemical and Technologies Sciences, Universidad of Castilla-La Mancha-IRICA, 13071-Ciudad Real, Spain.

[b] Department of Physical Chemistry, Faculty of Sciences, University of Málaga. 29071 Málaga

#### Contents:

|                                             |   |
|---------------------------------------------|---|
| 1. Topology of frontier molecular orbitals. | 2 |
| 2. Emission spectra                         | 4 |
| 3. CV Voltammograms                         | 4 |
| 4. Theoretical and experimental Raman.      | 8 |

1. Topology of frontier molecular orbitals.

| COMPOUND                                                                                                            | HOMO                                                                                                | LUMO                                                                                                 | BAND GAP (eV) |
|---------------------------------------------------------------------------------------------------------------------|-----------------------------------------------------------------------------------------------------|------------------------------------------------------------------------------------------------------|---------------|
| 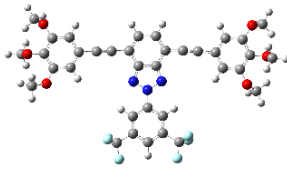 <p><b>Bzt-OCH<sub>3</sub></b></p> |  <p>-5.29 eV</p>   |  <p>-2.48 eV</p>   | 2.81          |
|  <p><b>Bzt-phe</b></p>             |  <p>-5.29 eV</p>   |  <p>-2.65 eV</p>   | 2.64          |
|  <p><b>Bzt-pyr</b></p>           |  <p>-5.07 eV</p> |  <p>-2.68 eV</p> | 2.39          |
|  <p><b>Bzt-bith</b></p>          |  <p>-5.10 eV</p> |  <p>-2.71 eV</p> | 2.39          |
|  <p><b>Bzt-thbz</b></p>          |  <p>-5.10 eV</p> |  <p>-2.83 eV</p> | 2.27          |

|                                                                                                                    |                                                                                                     |                                                                                                      |      |
|--------------------------------------------------------------------------------------------------------------------|-----------------------------------------------------------------------------------------------------|------------------------------------------------------------------------------------------------------|------|
| 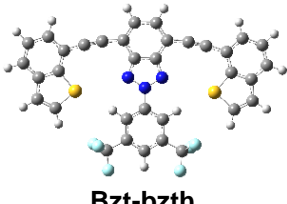 <p><b>Bzt-bzth</b></p>           |  <p>-5.41 eV</p>   |  <p>-2.64 eV</p>   | 2.77 |
|  <p><b>Bzt-NH<sub>2</sub></b></p> |  <p>-4.91 eV</p>   |  <p>-2.43 eV</p>   | 2.48 |
|  <p><b>Bzt-tpa</b></p>           |  <p>-4.81 eV</p>  |  <p>-2.42 eV</p>  | 2.39 |
|  <p><b>Bzt-cbz</b></p>          |  <p>-5.30 eV</p> |  <p>-2.72 eV</p> | 2.58 |
|  <p><b>Bzt-phenox</b></p>       |  <p>-4.73 eV</p> |  <p>-2.84 eV</p> | 1.89 |

**Table S1.** Topology of frontier molecular orbital computed at B3LYP/6-31G(d,p) of the synthesized compounds.

## 2. Emission spectra

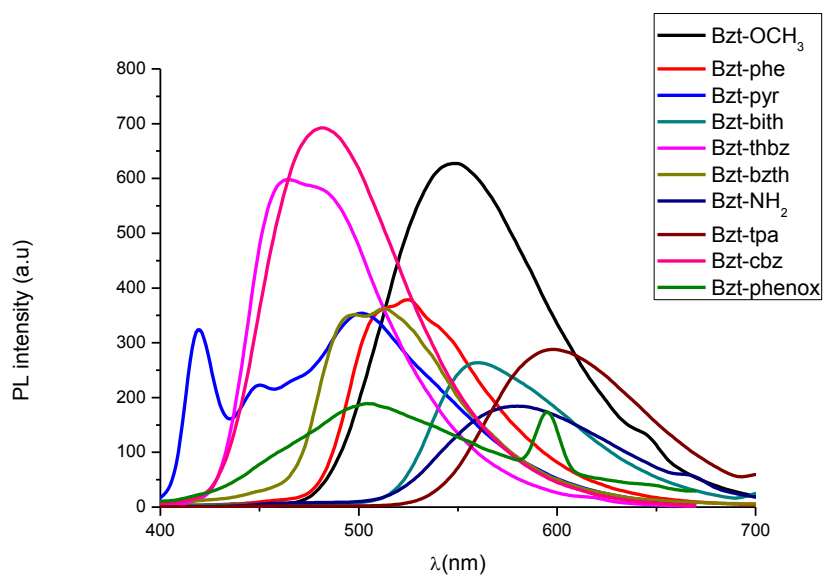

**Figure S1.** UV/Visible emission spectra of compounds **Bzt-Ar** (298 K, CHCl<sub>3</sub>, 1 x 10<sup>-5</sup> M)

## 3. CV Voltammograms

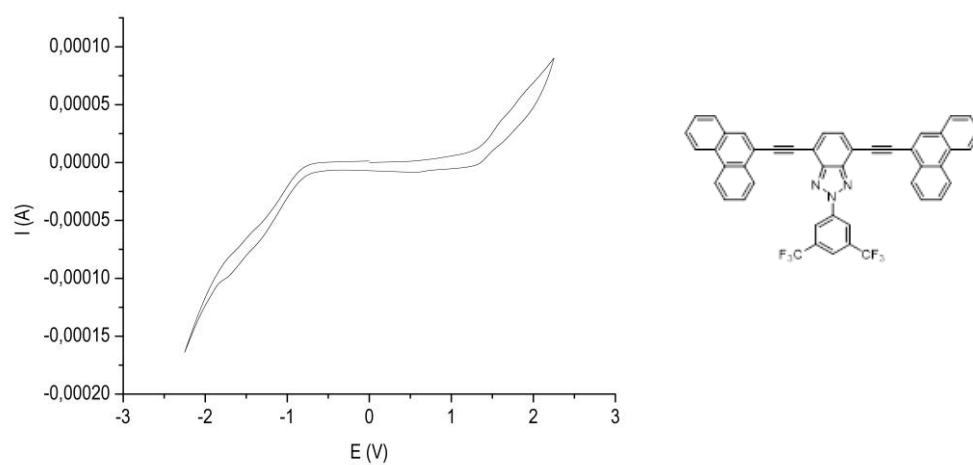

**Figure S2.** Cyclic Voltammograms of compound **Bzt-phe**.

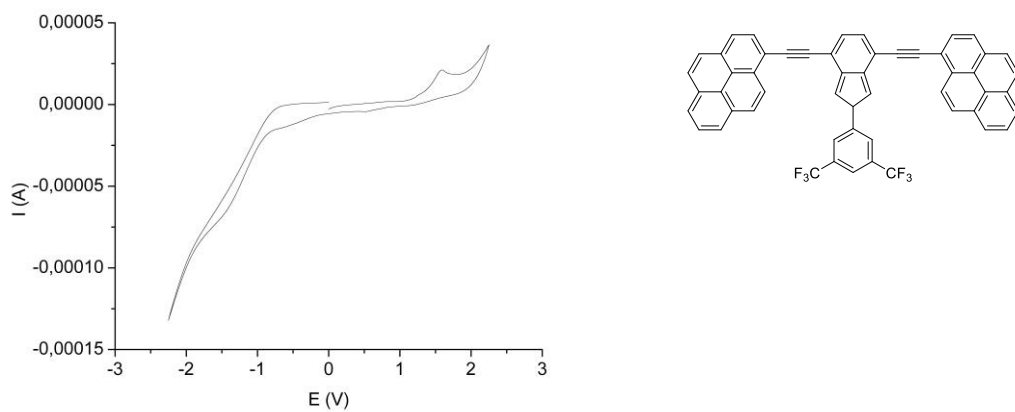

**Figure S3.** Cyclic Voltammograms of compound **Bzt-pyr**.

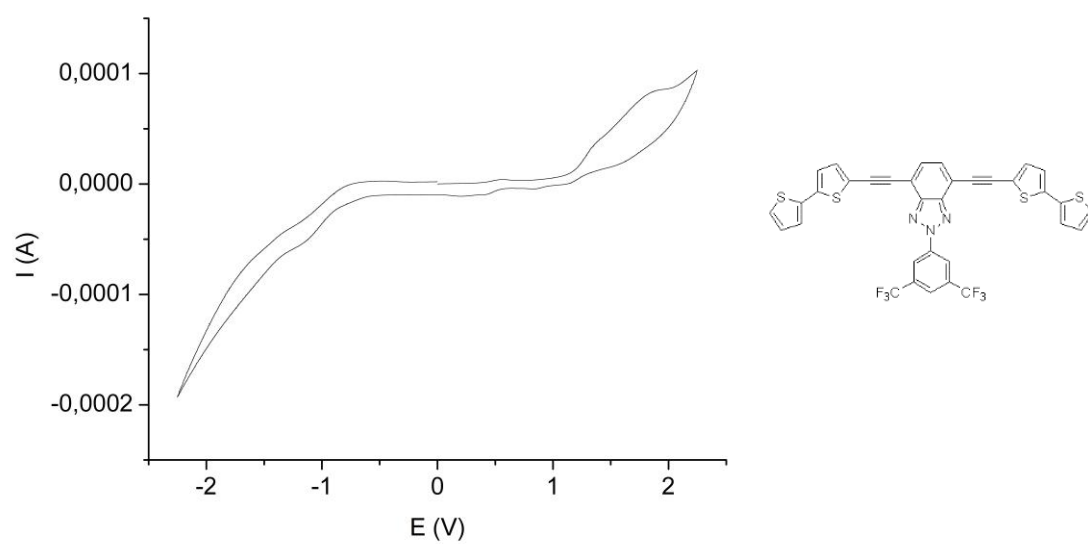

**Figure S4.** Cyclic Voltammograms of compound **Bzt-bith**.

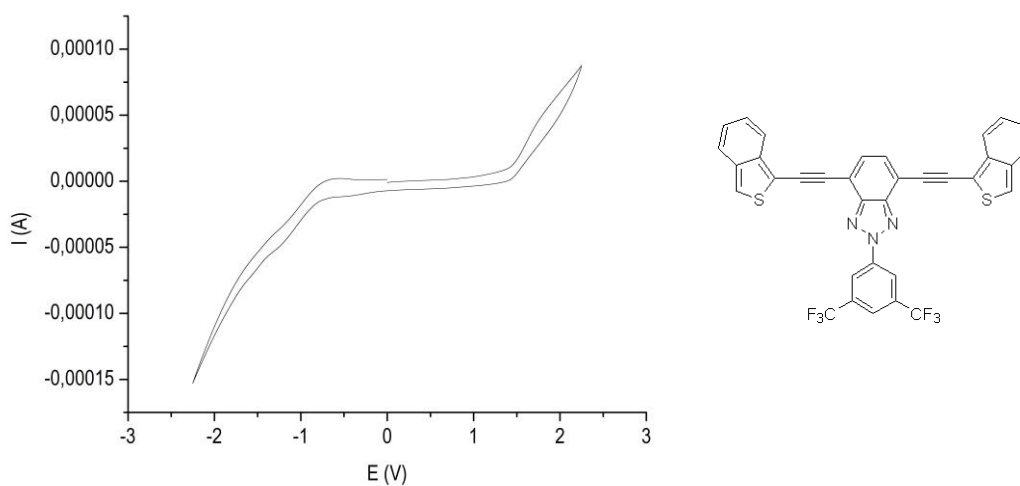

**Figure S5.** Cyclic Voltammograms of compound **Bzt-thbz**.

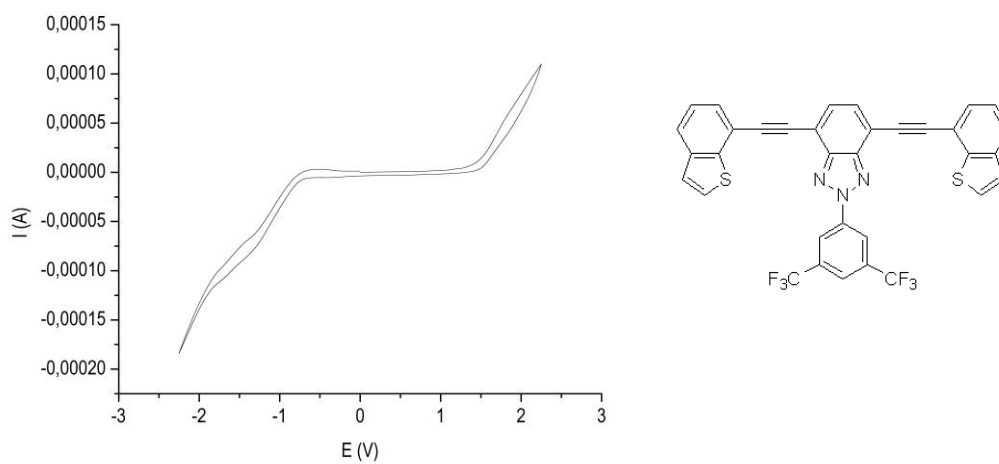

**Figure S6.** Cyclic Voltammograms of compound **Bzt-bzth**.

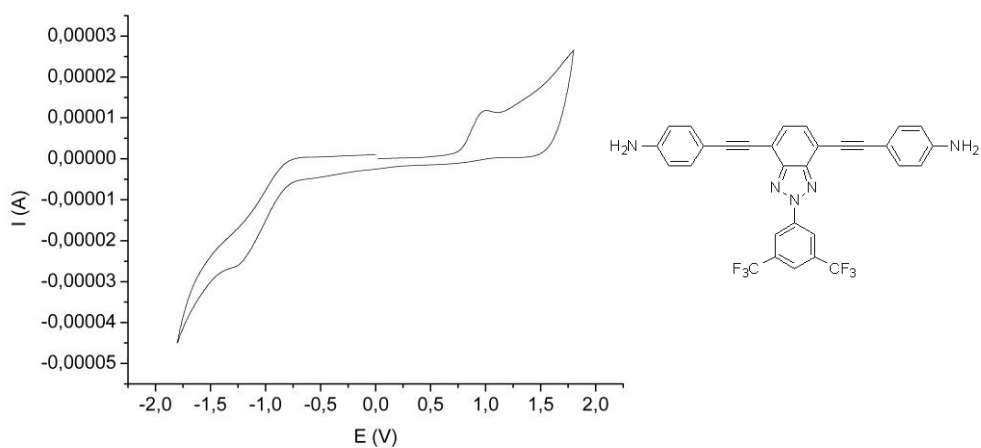

**Figure S7.** Cyclic Voltammograms of compound **Bzt-NH<sub>2</sub>**.

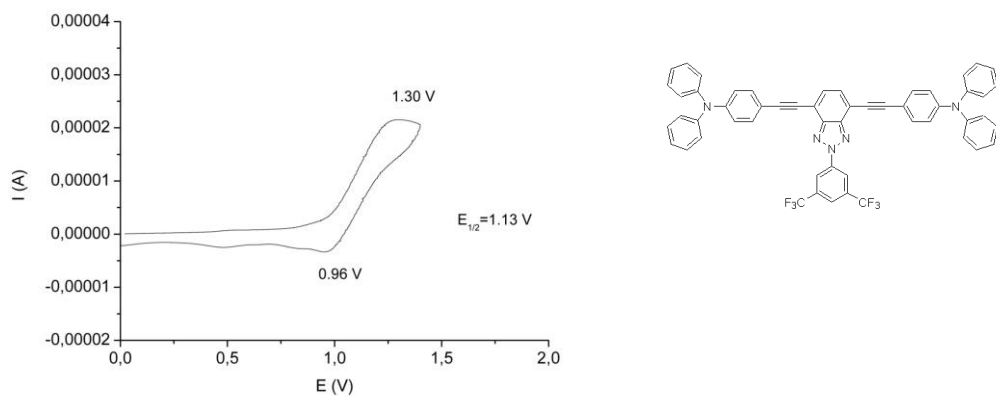

**Figure S8.** Cyclic Voltammograms of compound **Bzt-tpa**.

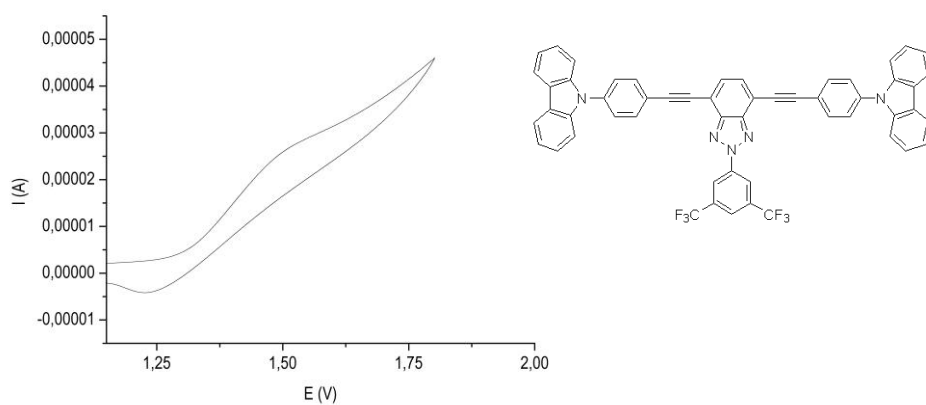

**Figure S9.** Cyclic Voltammograms of compound **Bzt-cbz**.

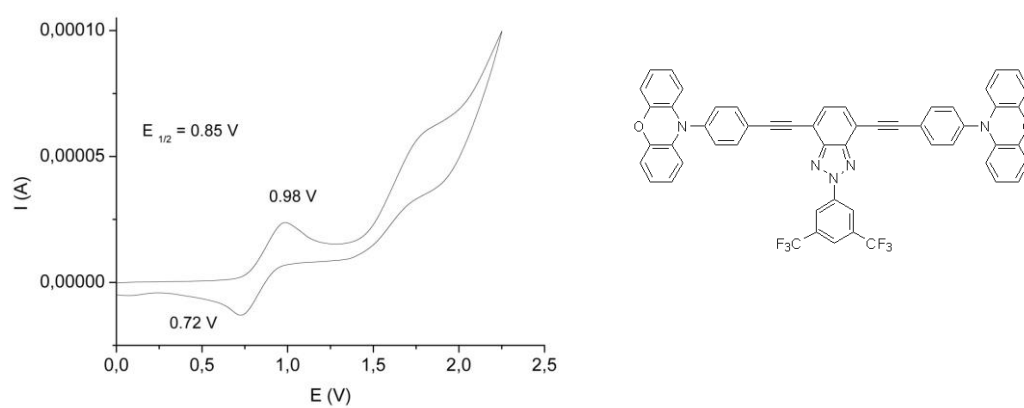

**Figure S10.** Cyclic Voltammograms of compound **Bzt-phenox**.

#### 4. Theoretical and experimental Raman.

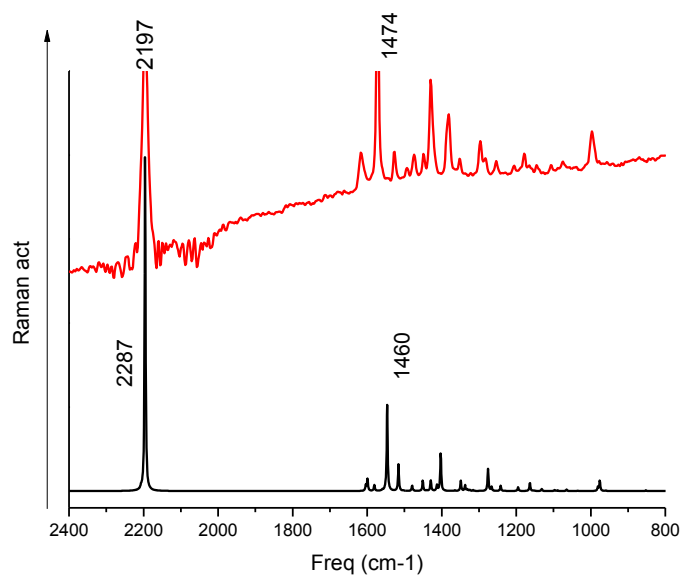

**Figure S11.** Comparison between experimental Raman spectra (red) and theoretical Raman spectra (black) for **Bzt-phe**. Theoretical data were calculated by B3LYP/6-31G(d,p).

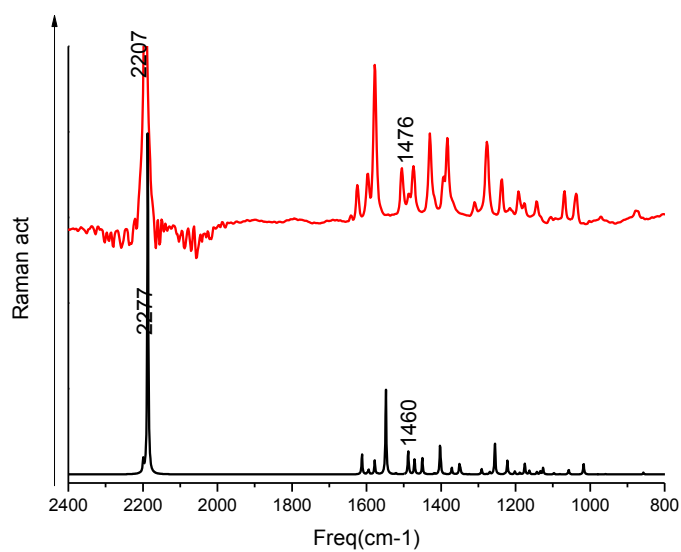

**Figure S12.** Comparison between experimental Raman spectra (red) and theoretical Raman spectra (black) for **Bzt-pyr**. Theoretical data were calculated by B3LYP/6-31G(d,p).



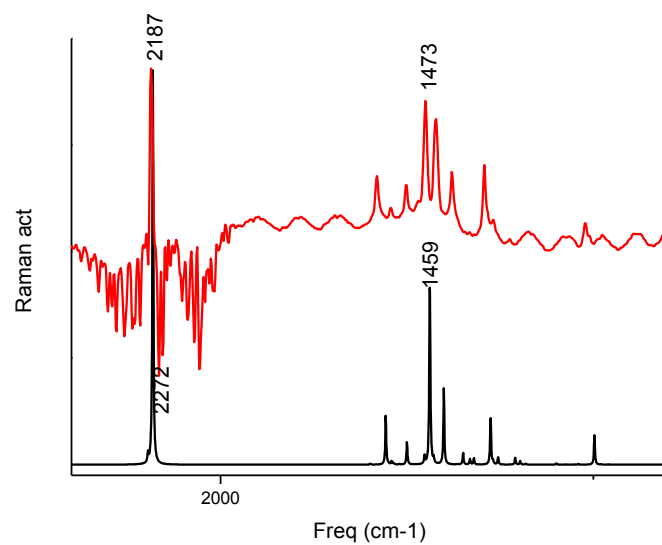

**Figure S13.** Comparison between experimental Raman spectra (red) and theoretical Raman spectra (black) for **Bzt-bith**. Theoretical data were calculated by B3LYP/6-31G(d,p).

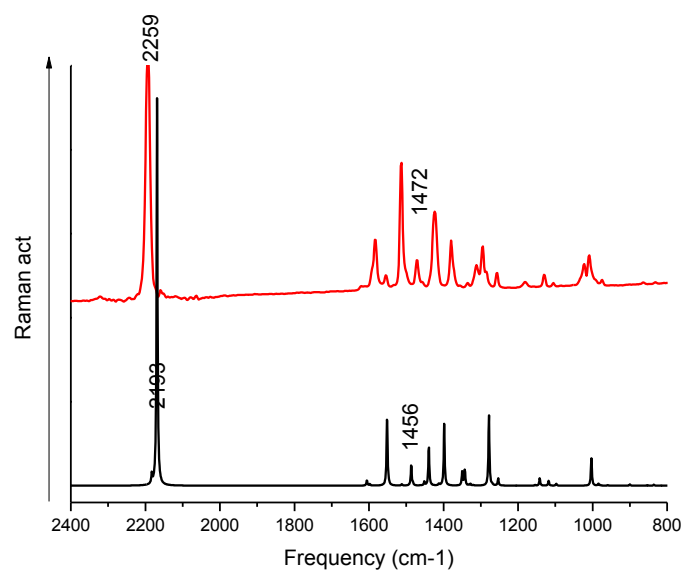

**Figure S14.** Comparison between experimental Raman spectra (red) and theoretical Raman spectra (black) for **Bzt-thbz**. Theoretical data were calculated by B3LYP/6-31G(d,p).

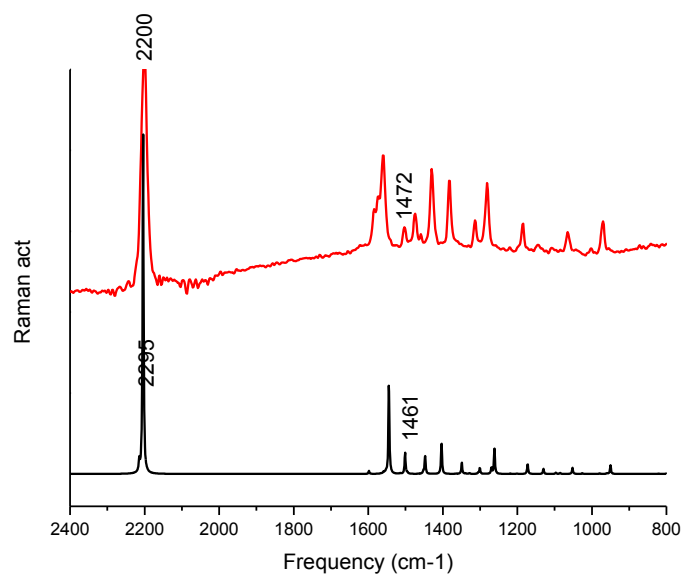

**Figure S15.** Comparison between experimental Raman spectra (red) and theoretical Raman spectra (black) for **Bzt-bzth**. Theoretical data were calculated by B3LYP/6-31G(d,p).

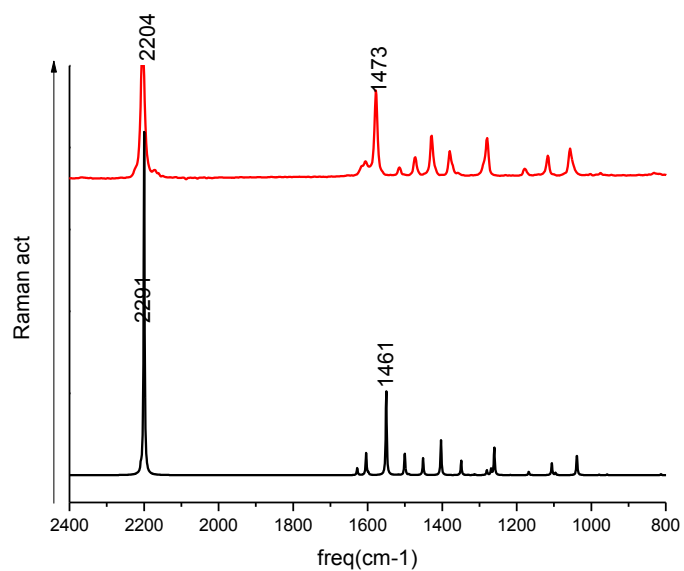

**Figure S16.** Comparison between experimental Raman spectra (red) and theoretical Raman spectra (black) for **Bzt-NH<sub>2</sub>**. Theoretical data were calculated by B3LYP/6-31G(d,p).

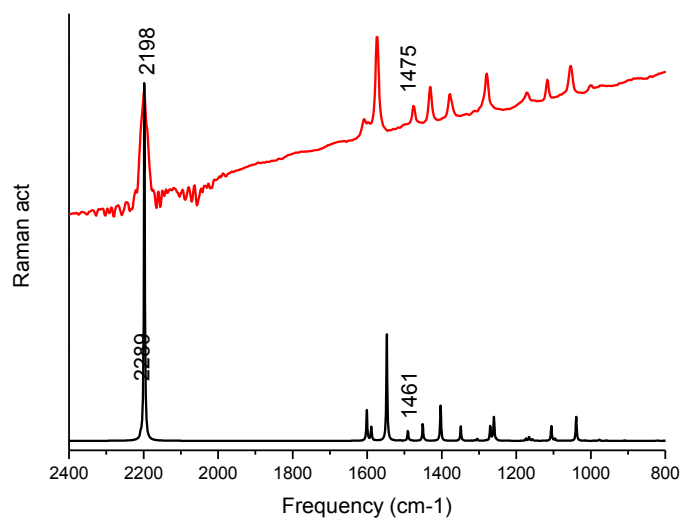

**Figure S17.** Comparison between experimental Raman spectra (red) and theoretical Raman spectra (black) for **Bzt-tpa**. Theoretical data were calculated by B3LYP/6-31G(d,p).

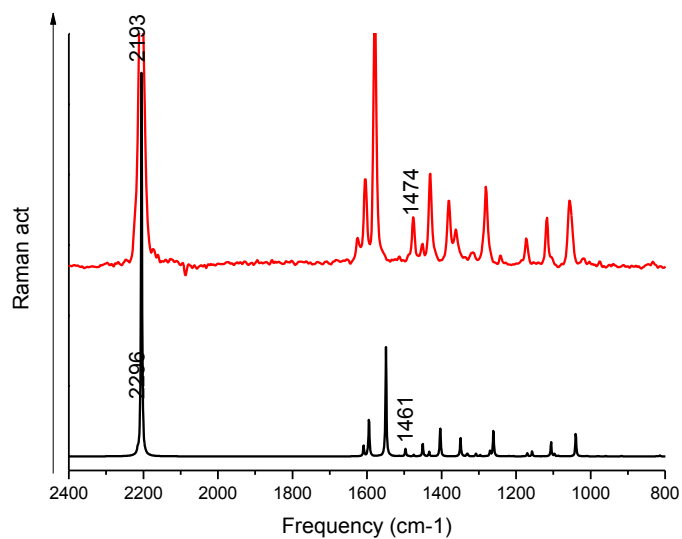

**Figure S18.** Comparison between experimental Raman spectra (red) and theoretical Raman spectra (black) for **Bzt-cbz**. Theoretical data were calculated by B3LYP/6-31G(d,p).

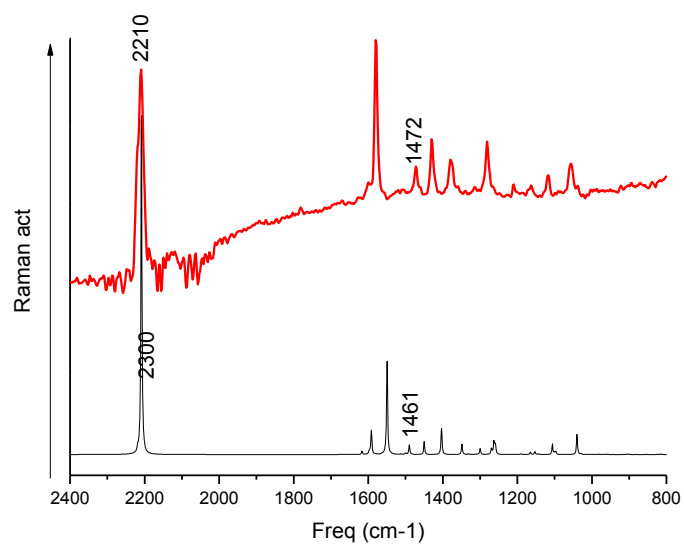

**Figure S19.** Comparison between experimental Raman spectra (red) and theoretical Raman spectra (black) for **Bzt-phenox**. Theoretical data were calculated by B3LYP/6-31G(d,p).
